# Supplementary material for: Impaired PPARγ activation by cadmium exacerbates infection-induced lung injury
Source: PubMed Central journal article supplement (PMC10243824; doi:10.1172/jci.insight.166608), 2023-05-08

## **Supplemental Information**

### **Impaired PPAR $\gamma$ activation by cadmium exacerbates infection-induced lung injury**

Jennifer L. Larson-Casey, Shanrun Liu, Jennifer M. Pyles, Suzanne E. Lapi, Komal Saleem,  
Veena B. Antony, Manuel Lora Gonzalez, David K. Crossman, and A. Brent Carter

## Supplemental Figures and Legends:

Supplemental Figure 1

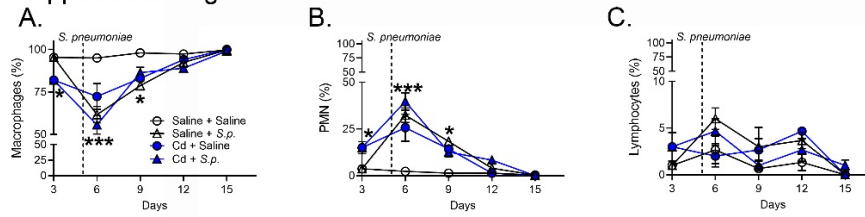

**Supplemental Figure 1. Cell differentials from exposed mice.** Cell differential to identify (A) macrophages, (B) neutrophils (PMN), and (C) lymphocytes.  $n = 3$ . \*,  $p < 0.05$ ; \*\*\*,  $p < 0.0001$  vs. Saline + Saline. Values shown as mean  $\pm$  S.E.M. Two-way AVOVA, Tukey's post hoc.

Supplemental Figure 2

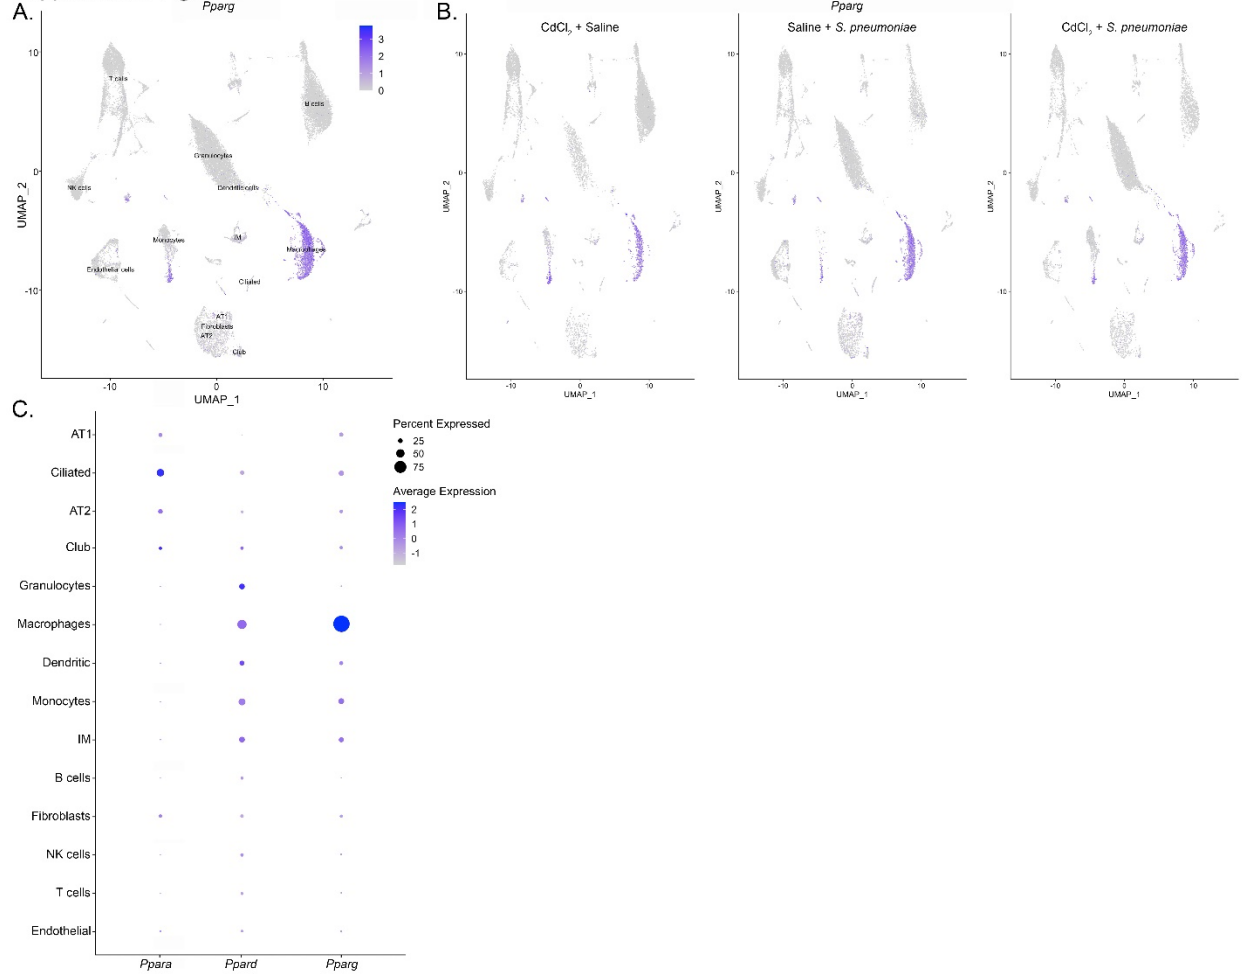

**Supplemental Figure 2. Cell clusters expressing *Pparg* from exposed mice.** *Pparg* expression on UMAP plot of (A) all cells and (B) after individual exposure. (C) Dot plots of *Ppara*, *Ppard*, and *Pparg* expression in all cell clusters.

### Supplemental Figure 3

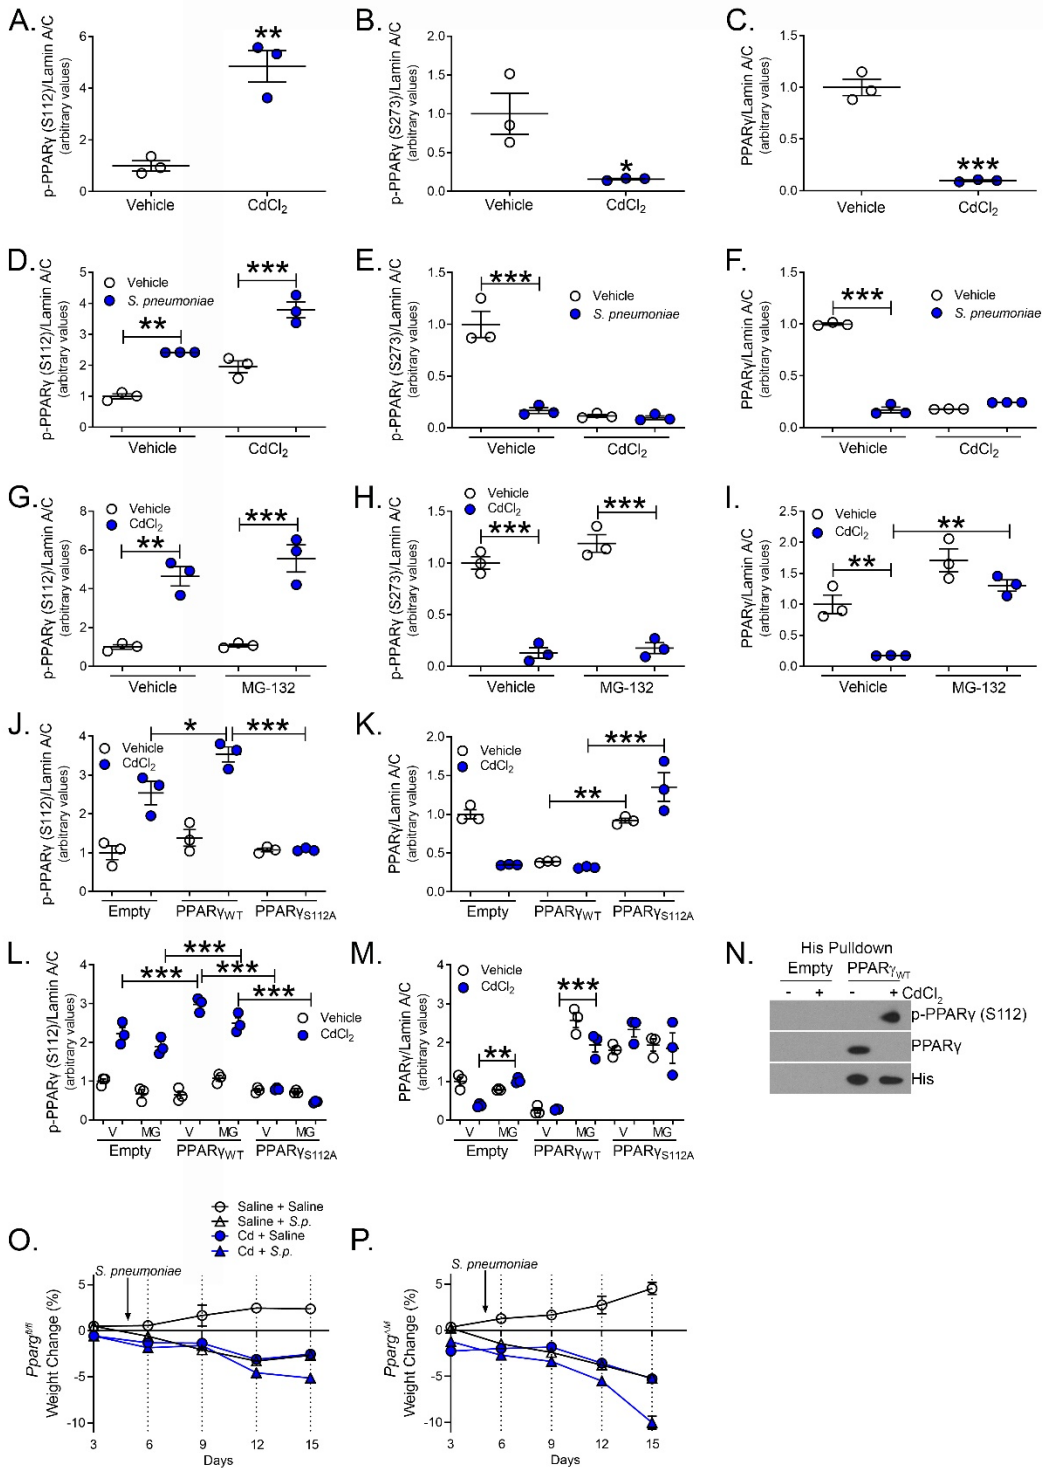

**Supplemental Figure 3. Cadmium regulates PPAR $\gamma$  phosphorylation at Ser<sup>112</sup> resulting in greater lung injury.** Statistical quantification of (A) p-PPAR $\gamma$  (S112), (B) p-PPAR $\gamma$  (S273), and (C) PPAR $\gamma$  from the nuclear immunoblot analysis of THP-1 cells exposed to CdCl<sub>2</sub> (50  $\mu$ M, 3h)

*n* = 3. Statistical quantification of **(D)** p-PPAR $\gamma$  (S112), **(E)** p-PPAR $\gamma$  (S273), and **(F)** PPAR $\gamma$  from the nuclear immunoblot analysis from BAL cells from exposed WT mice *n* = 3. Statistical quantification of **(G)** p-PPAR $\gamma$  (S112), **(H)** p-PPAR $\gamma$  (S273), and **(I)** PPAR $\gamma$  from immunoblot analysis in isolated nuclear extract of THP-1 cells treated with vehicle or MG-132 (20  $\mu$ M, 6h) and saline or CdCl $_2$  (50  $\mu$ M, 3h) *n* = 3. Statistical quantification of **(J)** p-PPAR $\gamma$  (S112) and **(K)** PPAR $\gamma$  from the nuclear immunoblot analysis of THP-1 cells expressing empty, PPAR $\gamma_{WT}$ , or PPAR $\gamma_{S112A}$  treated with saline or CdCl $_2$  *n* = 3. Statistical quantification of **(L)** p-PPAR $\gamma$  (S112) and **(M)** PPAR $\gamma$  from the nuclear immunoblot analysis of THP-1 cells expressing empty, PPAR $\gamma_{WT}$ , or PPAR $\gamma_{S112A}$  treated with saline or CdCl $_2$  and vehicle or MG-132. *n* = 3. **(N)** THP-1 cells transfected with empty or PPAR $\gamma_{WT}$ -His and treated with saline or CdCl $_2$  (50  $\mu$ M, 3h). PPAR $\gamma$ -His was purified by pull down and immunoprecipitation for PPAR $\gamma$ . Percent weight change of exposed **(O)** *Pparg*<sup>*fl/fl*</sup> and **(P)** *Pparg*<sup>*ΔM*</sup> mice. *n* = 3-5. \*, *p* < 0.05; \*\*, *p* < 0.001; \*\*\*, *p* < 0.0001. Values shown as mean  $\pm$  S.E.M. Student's *t*-test used in A-C. One-way AVOVA, Tukey's post hoc.

# Supplemental Figure 4

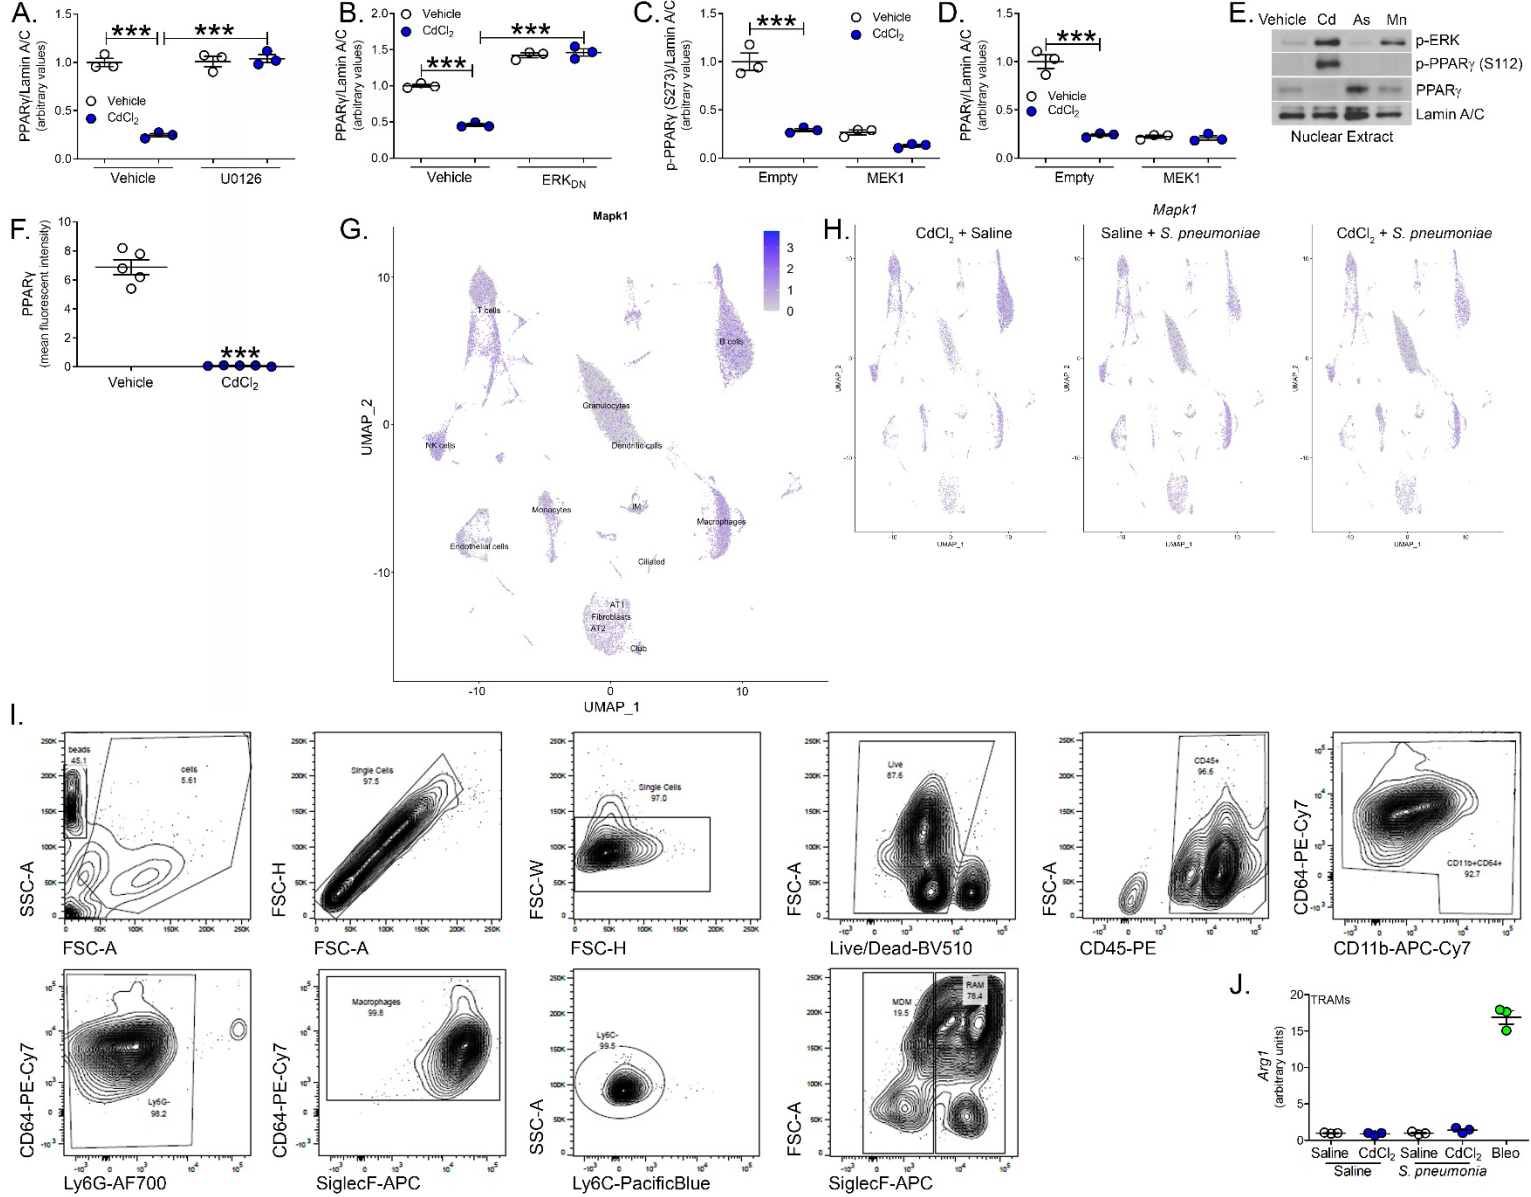

**Supplemental Figure 4. Cell clusters expressing *Mapk1* from exposed mice.** (A) Statistical quantification of PPAR $\gamma$  from the nuclear immunoblot analysis of THP-1 cells exposed to vehicle or U0126 (10  $\mu$ M, 1h) and CdCl $_2$  (50  $\mu$ M, 3h)  $n = 3$ . (B) Statistical quantification of PPAR $\gamma$  from the nuclear immunoblot analysis of THP-1 cells transfected with empty or ERK $_{DN}$  and exposed to saline or CdCl $_2$   $n = 3$ . Statistical quantification of (C) p-PPAR $\gamma$  (S273) and (D) PPAR $\gamma$  from the nuclear immunoblot analysis of THP-1 cells transfected with empty or MEK1 and exposed to saline or CdCl $_2$   $n = 3$ . (E) Immunoblot analysis of THP-1 cells exposed to CdCl $_2$  (50  $\mu$ M, 3h), NaAsO $_3$  (100  $\mu$ M, 3h), or MnCl $_2$  (200  $\mu$ M, 3h). (F) Statistical quantification of representative confocal imaging of exposed MH-S cells for PPAR $\gamma$  staining  $n = 5$ . *Mapk1* expression on UMAP plot of (G) all cells and (H) after individual exposure. (I) Representative flow gating strategy from isolated BAL after cadmium exposure. Tissue resident alveolar macrophages (TRAM, CD45 $^{+}$  CD11b $^{+/-}$  Ly6G $^{-}$  CD64 $^{+}$  Ly6c $^{-}$  Siglec F $^{hi}$ ) and monocyte-derived macrophages (MDM, CD45 $^{+}$  CD11b $^{+/-}$  Ly6G $^{-}$  CD64 $^{+}$  Ly6c $^{-}$  Siglec F $^{low}$ ). (J) Arginine 1 mRNA expression in TRAMs from exposed WT mice, bleomycin (bleo) BAL cells used as positive control.  $n = 3$ . \*\*\*,  $p < 0.0001$ . Values shown as mean  $\pm$  S.E.M. Student's  $t$ -test used in F. One-way AVOVA, Tukey's post hoc.

## Supplemental Figure 5

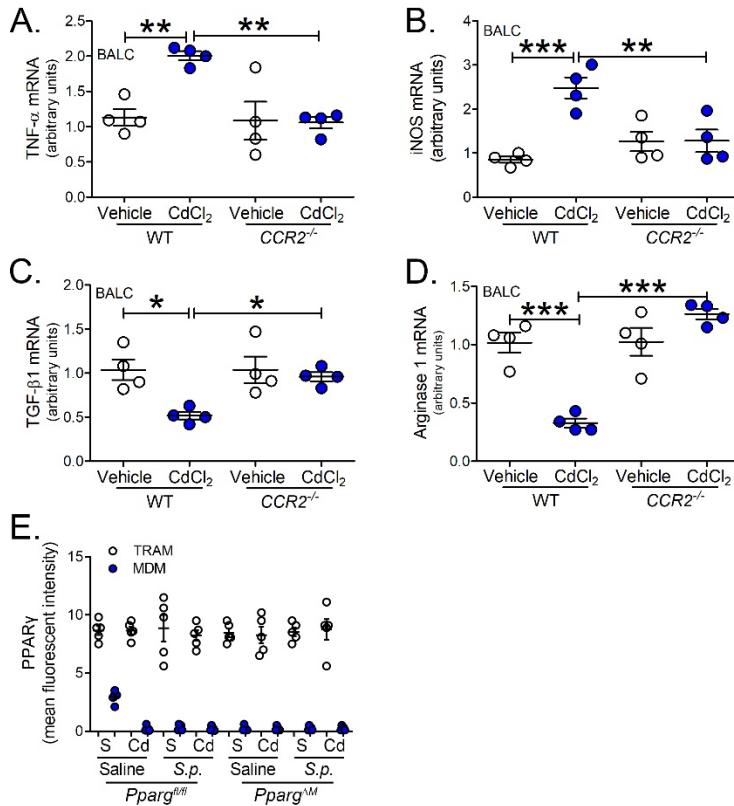

### Supplemental Figure 5. *CCR2*<sup>-/-</sup> mice show inhibition of cadmium-mediated inflammation.

WT and *CCR2*<sup>-/-</sup> mice were exposed to saline or CdCl<sub>2</sub> (100ng/kg) by i.t. administration. mRNA expression in isolated BAL cells of (A) TNF- $\alpha$ , (B) iNOS, (C) TGF- $\beta$ 1, and (D) Arg1.  $n = 4$ . Statistical quantification of confocal imaging from (E) PPAR $\gamma$  staining  $n = 5$ . \*,  $p < 0.05$ ; \*\*,  $p < 0.001$ ; \*\*\*,  $p < 0.0001$ . Values shown as mean  $\pm$  S.E.M. One-way AVOVA, Tukey's post hoc.



## Supplemental Figure 6

A.

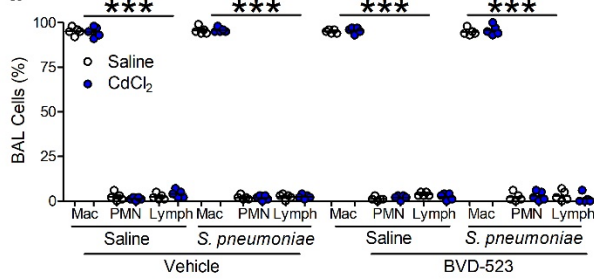

B.

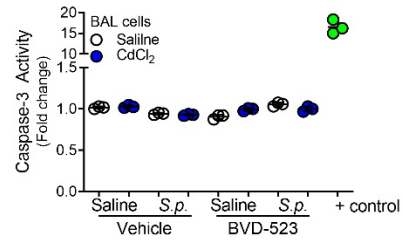

**Supplemental Figure 6. ERK inhibition does not alter cell type present in BAL fluid. (A)** Cell differential to identify macrophages (mac), neutrophils (PMN), and lymphocytes (lymph).  $n = 5$ . **(B)** Caspase-3 activity in BAL cells from exposed mice.  $n = 3$ . Positive control = 5  $\mu$ M Rhodamine 110 reference standard. \*\*\*,  $p < 0.0001$ . Values shown as mean  $\pm$  S.E.M. One-way AVOVA, Tukey's post hoc.

Figure 3

A.

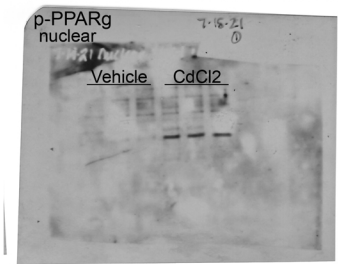

B.

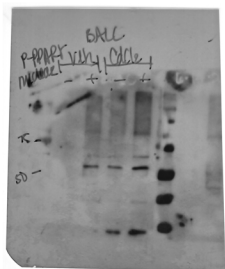

C.

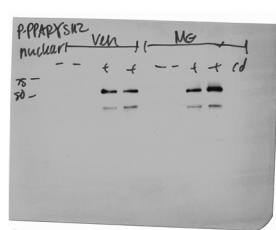

D.

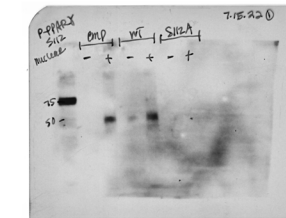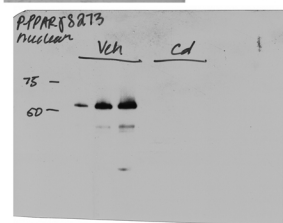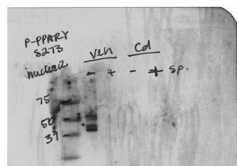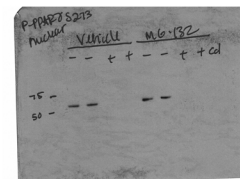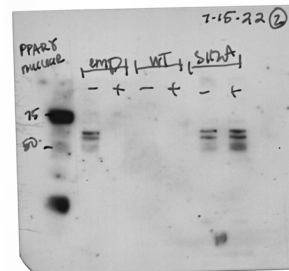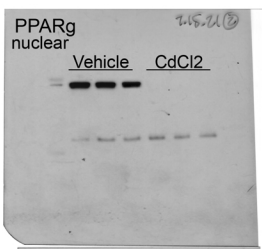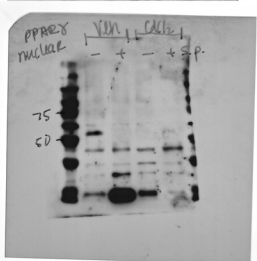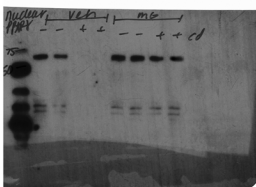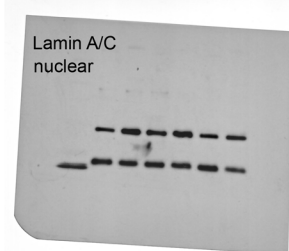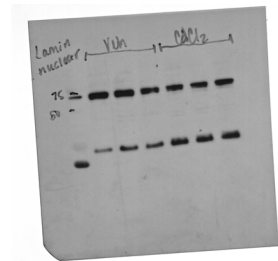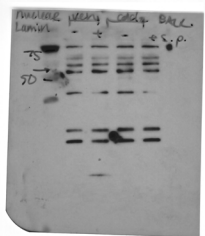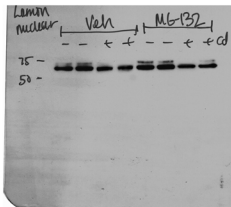

E.

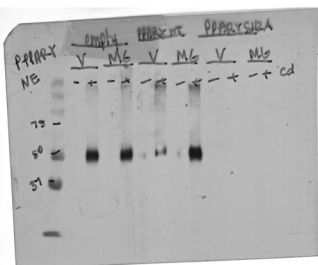

G.

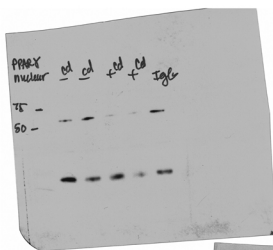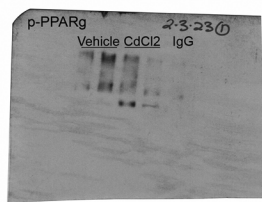

I.

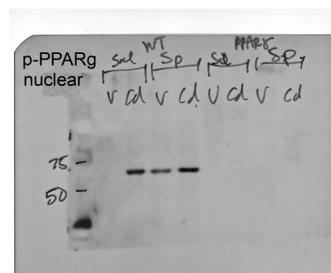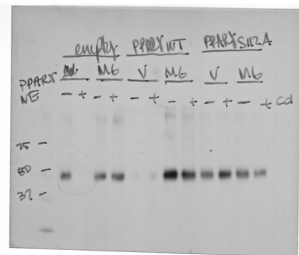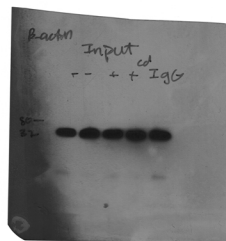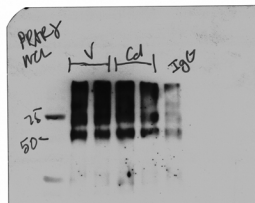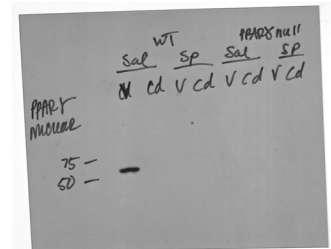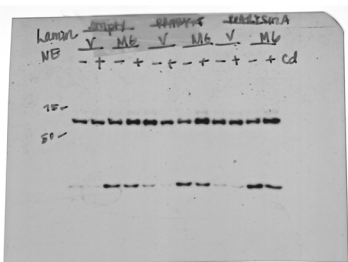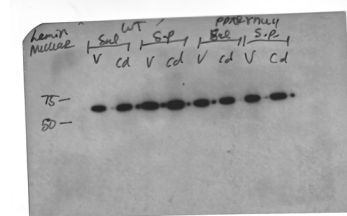

Figure 4

A.

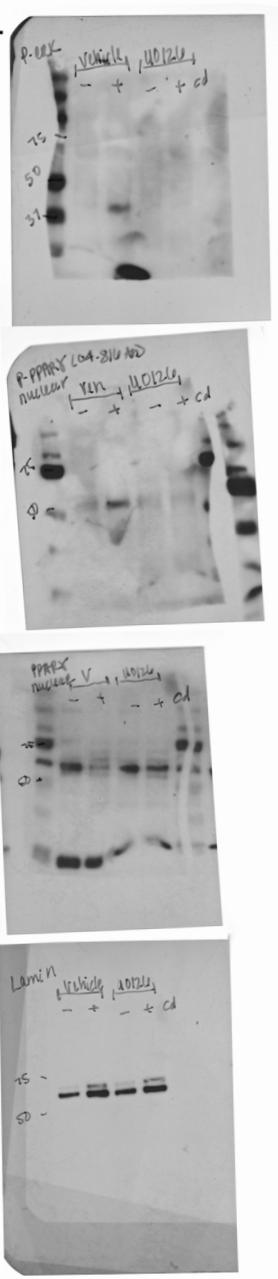

D.

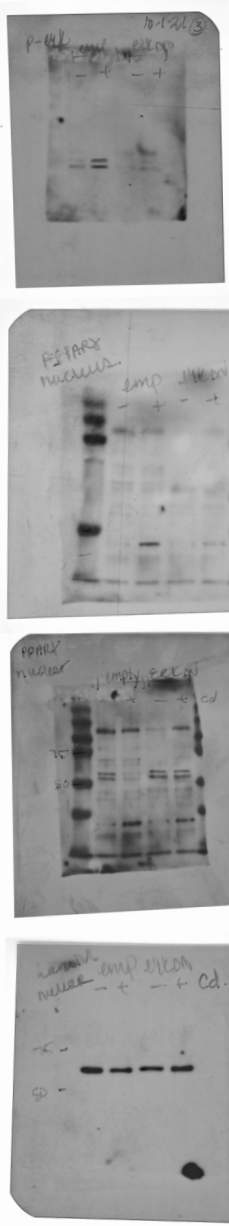

G.

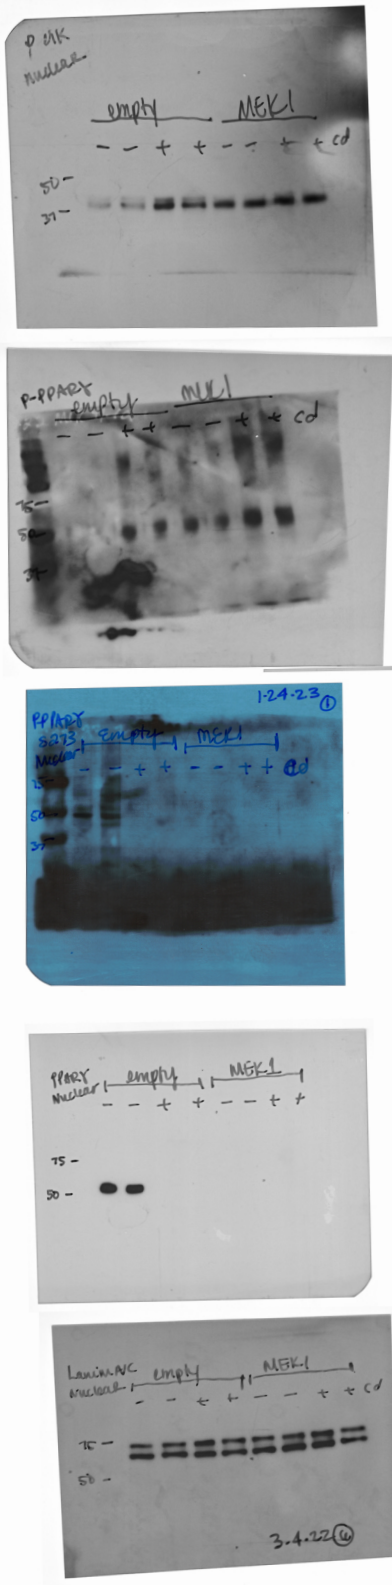

N.

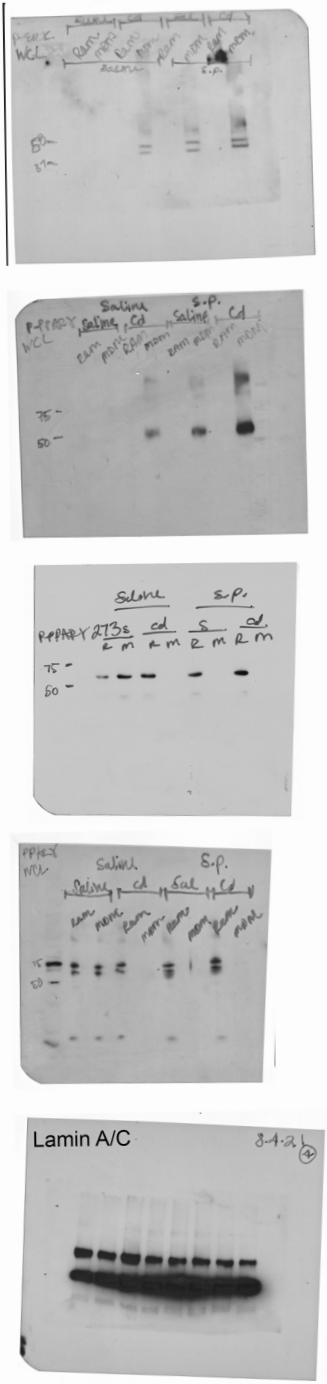

Figure 6

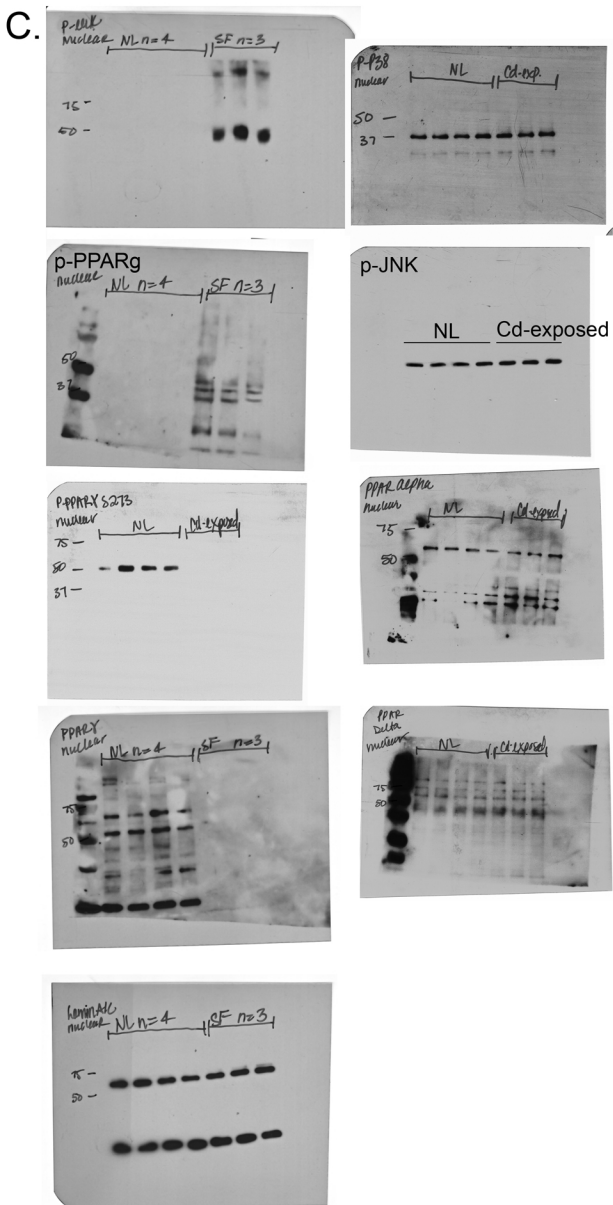

Figure 7

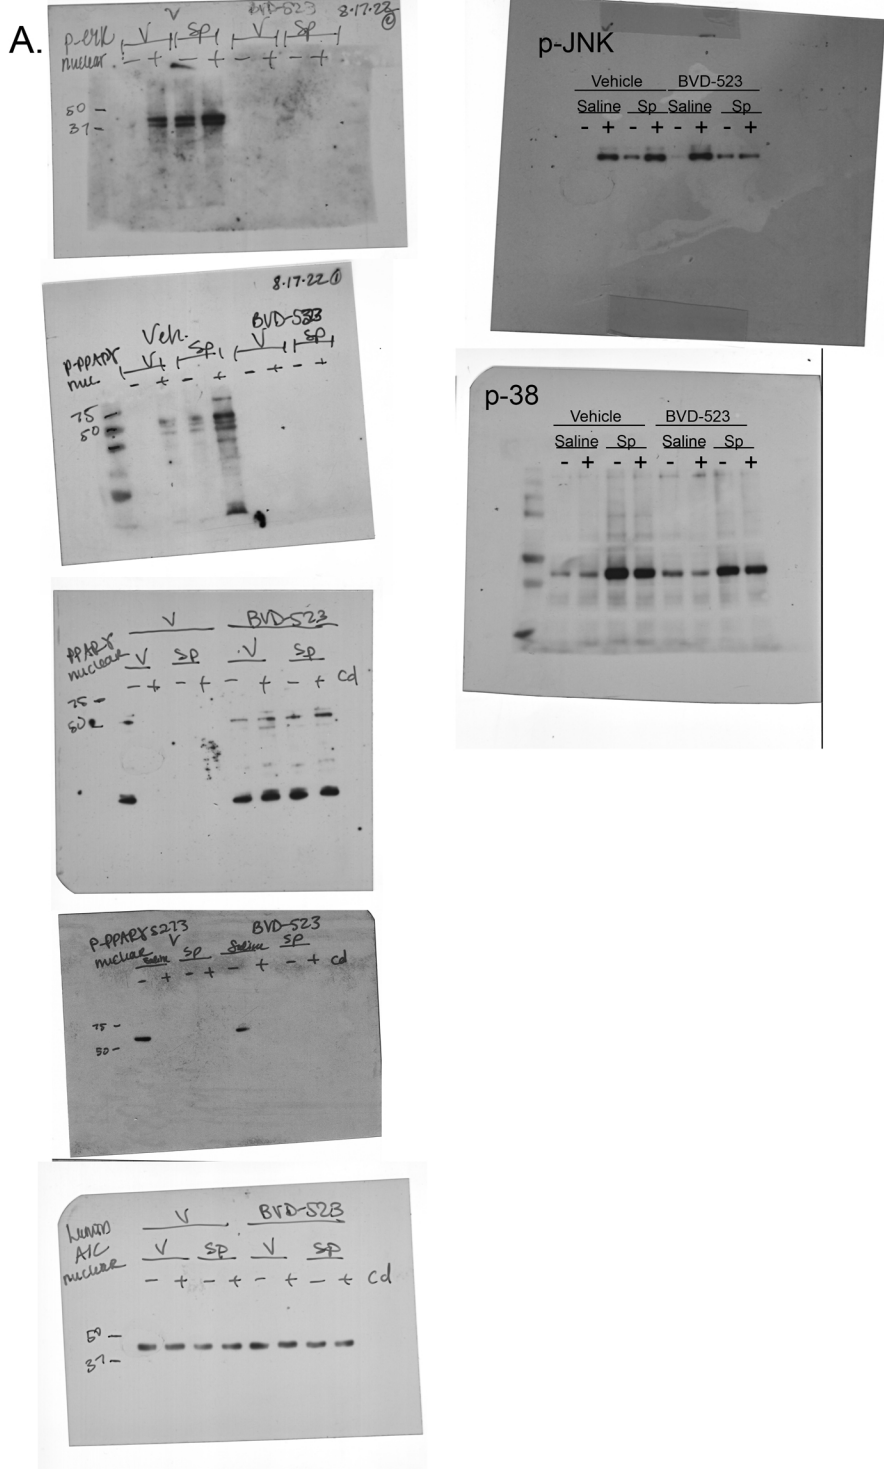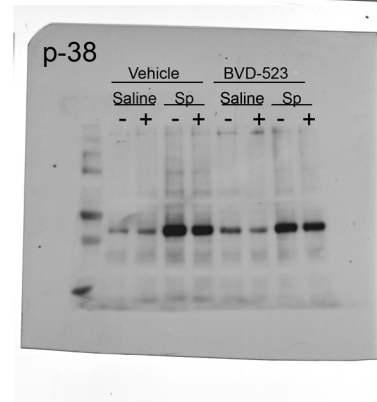

Supplemental Figure 3

N.

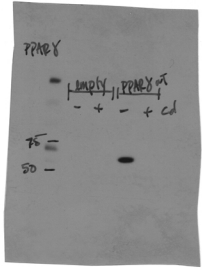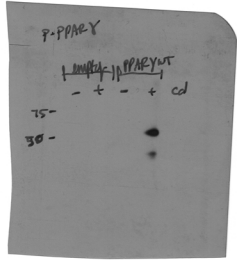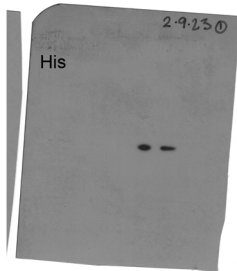

Supplemental Figure 4

E.

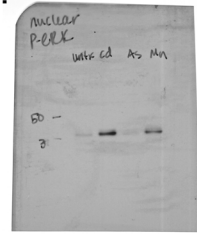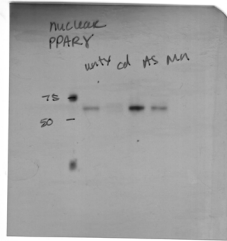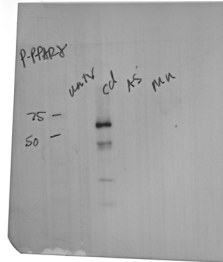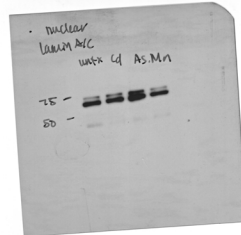

Supplement: jciinsight-8-166608-s008.pdf [file jciinsight-8-166608-s008.pdf]
